# Supplementary material for: Neurosurgical Care during the COVID-19 Pandemic in Central Germany: A Retrospective Single Center Study of the Second Wave
Source: MDPI journal article supplement (doi:10.3390/ijerph182212034), 2021-11-16
Supplement: s1 [file s1]

**Table S1.** Detailed unplanned readmission reasons for the pandemic and pre-pandemic patient group.

| <b>N = 62</b>             | <b>Pandemic<br/>N = 27</b> | <b>Pre-Pandemic<br/>N = 35</b> |                       |
|---------------------------|----------------------------|--------------------------------|-----------------------|
| <b>Readmission Causes</b> | <b>N (%)</b>               | <b>N (%)</b>                   | <b><i>p</i>-Value</b> |
| SSI                       | 5 (18.52)                  | 10 (28.57)                     | 0.3903                |
| Nosocomial infection      | 5 (18.52)                  | 2 (5.71)                       | 0.223                 |
| Recurrent hemorrhage      | 3 (11.11)                  | 2 (5.71)                       | 0.6450                |
| Shunt dysfunction         | 2 (7.41)                   | 1 (2.86)                       | 0.5752                |
| Convulsion                | 1 (3.70)                   | 6 (17.14)                      | 0.1257                |
| Hydrocephalus             | 1 (3.70)                   | 3 (8.57)                       | 0.6256                |
| Recurrent disk herniation | 2 (7.41)                   | 0                              | 0.1856                |
| CSF infection             | 1 (3.70)                   | 1 (2.86)                       | 0.435                 |
| Fall                      | 2 (7.41)                   | 1 (2.86)                       | 0.5752                |
| Malfunction device        | 1 (3.70)                   | 2 (5.71)                       | 1.000                 |
| Pain                      | 1 (3.70)                   | 1 (2.86)                       | 1.000                 |
| Neurologic impairment     | 1 (3.70)                   | 0                              | 0.4355                |
| Stroke                    | 1 (3.70)                   | 0                              | 0.4355                |
| Social indication         | 0                          | 2 (5.71)                       | 0.5003                |
| Other hemorrhage          | 1 (3.70)                   | 0                              | 0.4355                |
| Thrombosis                | 0                          | 1 (2.86)                       | 1.000                 |
| Multiple organ failure    | 0                          | 1 (2.86)                       | 1.000                 |
| Electrolyte degradation   | 0                          | 1 (2.86)                       | 1.000                 |
| Ileus                     | 0                          | 1 (2.86)                       | 1.000                 |

SSI, surgical site infection; CSF, cerebrospinal fluid.
